# Supplementary material
Source: ML conference proceedings conference paper supplement (https://proceedings.neurips.cc/paper_files/paper/2017/hash/821fa74b50ba3f7cba1e6c53e8fa6845-Abstract.html)
Supplement: Supplementary file [file 821fa74b50ba3f7cba1e6c53e8fa6845-Supplemental.zip]

---

# Supplementary Material for “Nonparametric Online Regression while Learning the Metric”

---

**Ilja Kuzborskij**  
EPFL  
Switzerland  
ilja.kuzborskij@gmail.com

**Nicolò Cesa-Bianchi**  
Dipartimento di Informatica  
Università degli Studi di Milano  
Milano 20135, Italy  
nicolo.cesa-bianchi@unimi.it

## 1 Nonparametric gradient learning

In this section we describe a nonparametric gradient learning algorithm introduced in [2]. Throughout this section, we assume instances  $\mathbf{x}_t$  are realizations of i.i.d. random variables  $\mathbf{X}_t$  drawn according to some fixed and unknown distribution  $\mu$  which has a continuous density on its support  $\mathcal{X}$ . Labels  $y_t$  are generated according to the noise model  $y_t = f(\mathbf{x}_t) + \nu(\mathbf{x}_t)$ , where  $\nu(\mathbf{x})$  is a subgaussian zero-mean random variable for all  $\mathbf{x} \in \mathcal{X}$ . The algorithm computes a sequence of estimates  $\hat{f}_1, \hat{f}_2, \dots$  of the regression function  $f$  through kernel regression. Let  $\mathcal{X}_n \equiv \{\mathbf{x}_1, \dots, \mathbf{x}_n\} \subset \mathcal{X}$  be the data observed so far and let  $y_1, \dots, y_n$  their corresponding labels. Let  $K : \mathbb{R}_+ \rightarrow \mathbb{R}_+$  be a nonincreasing kernel, strictly positive on  $[0, 1)$ , and such that  $K(1) = 0$ . Then the estimate at time  $n$  is defined by

$$\hat{f}_n(\mathbf{x}) = \sum_{t=1}^n y_t \omega_t(\mathbf{x}) \quad \text{where} \quad \omega_t(\mathbf{x}) = \begin{cases} \frac{K(\|\mathbf{x} - \mathbf{x}_t\|/\varepsilon_n)}{\sum_{s=1}^n K(\|\mathbf{x} - \mathbf{x}_s\|/\varepsilon_n)} & \text{if } \mathcal{B}(\mathbf{x}, \varepsilon_n) \cap \mathcal{X}_n \neq \emptyset, \\ 1/n & \text{otherwise} \end{cases}$$

where  $\varepsilon_n > 0$  is the kernel scaling parameter. We then approximate the gradient of  $\hat{f}$  at any given point through the finite difference method

$$\Delta_i(\mathbf{x}) = \frac{1}{2\tau_n} \left( \hat{f}(\mathbf{x} + \tau_n \mathbf{e}_i) - \hat{f}(\mathbf{x} - \tau_n \mathbf{e}_i) \right) \quad \text{for } i = 1, \dots, d$$

where  $\tau_n > 0$  is a parameter. Let further

$$A_i(\mathbf{x}) = \mathbb{I} \left\{ \min_{b \in \{-\tau_n, \tau_n\}} \mu_n(\mathcal{B}(\mathbf{x} + b\mathbf{e}_i, \varepsilon/2)) \geq \frac{2d}{n} (\ln 2n) \right\} \quad \text{for } i = 1, \dots, d$$

where  $\mu_n$  is the empirical distribution of  $\mu$  after observing  $\mathcal{X}_n$ , and define the gradient estimate

$$\hat{\nabla} f(\mathbf{x}_t) = \left( \Delta_1(\mathbf{x}_t) A_1(\mathbf{x}_t), \dots, \Delta_d(\mathbf{x}_t) A_d(\mathbf{x}_t) \right).$$

The algorithm outputs at time  $n$  the gradient outer product estimate

$$\hat{\mathbf{G}}_n = \frac{1}{n} \sum_{t=1}^n \hat{\nabla} f(\mathbf{x}_t) \hat{\nabla} f(\mathbf{x}_t)^\top$$

Let  $\mathbf{G} = \mathbb{E} [\nabla f(\mathbf{X}) \nabla f(\mathbf{X})^\top]$  be the expected gradient outer product, where  $\mathbf{X}$  has law  $\mu$ . The next lemma states that, under Assumption 1,  $\hat{\mathbf{G}}_n$  is a consistent estimate of  $\mathbf{G}$ .

**Lemma** (Consistency of the Expected Gradient Outerproduct Estimator [2, Theorem 1]). *If Assumption 1 holds, then there exists a nonnegative and nonincreasing sequence  $\{\gamma_n\}_{n \geq 1}$  such that for all  $n$ , the estimated gradient outerproduct (7) computed with parameters  $\varepsilon_n > 0$ , and  $0 < \tau_n < \tau_0$  satisfies  $\|\hat{\mathbf{G}}_n - \mathbf{G}\|_2 \leq \gamma_n$  with high probability with respect to the random draw of  $\mathbf{X}_1, \dots, \mathbf{X}_n$ . Moreover, if  $\tau_n = \Theta(\varepsilon_n^{1/4})$ ,  $\varepsilon_n = \Omega\left((\ln n)^{\frac{2}{d}} n^{-\frac{1}{d}}\right)$ , and  $\varepsilon_n = \mathcal{O}\left(n^{-\frac{1}{2(d+1)}}\right)$  then  $\gamma_n \rightarrow 0$  as  $n \rightarrow \infty$ .*

The actual rate of convergence depends, in a complicated way, on parameters related to the distribution  $\mu$  and the regression function  $f$ . In our application of Lemma 4 we assume  $\gamma_n \leq n^{-\alpha}$  for all  $n$  large enough and for some  $\alpha > 0$ . Note also that the convergence of  $\hat{G}_n$  to  $G$  holds in probability with respect to the random draw of  $\mathbf{X}_1, \dots, \mathbf{X}_n$ . Hence there is a confidence parameter  $\delta$  which is not shown here. However, the dependence of the convergence rate on  $\frac{1}{\delta}$  is only polylogarithmic and therefore not problematic for our applications.

## 2 Proofs from Section 3

**Lemma** (Volumetric packing bound). *Consider a pair of norms  $\|\cdot\|, \|\cdot\|'$  and let  $B, B' \subset \mathbb{R}^d$  be the corresponding unit balls. Then*

$$\mathcal{M}(B, \varepsilon, \|\cdot\|') \leq \frac{\text{vol}\left(B + \frac{\varepsilon}{2}B'\right)}{\text{vol}\left(\frac{\varepsilon}{2}B'\right)}.$$

*Proof.* Let  $\{\mathbf{x}_1, \dots, \mathbf{x}_M\}$  be a maximal  $\varepsilon$ -packing of  $B$  according to  $\|\cdot\|'$ . Since we have a packing, the  $\|\cdot\|'$ -balls of radius  $\varepsilon/2$  and centers  $\mathbf{x}_1, \dots, \mathbf{x}_M$  are disjoint, and their union is contained in  $B + \frac{\varepsilon}{2}B'$ . Thus,

$$M \text{vol}\left(\frac{\varepsilon}{2}B'\right) \leq \text{vol}\left(B + \frac{\varepsilon}{2}B'\right)$$

which concludes the proof.  $\square$

**Lemma** (Ellipsoid packing bound). *If  $B$  is the unit Euclidean ball then*

$$\mathcal{M}(B, \varepsilon, \|\cdot\|_M) \leq \left(\frac{8\sqrt{2}}{\varepsilon}\right)^s \prod_{i=1}^s \sqrt{\lambda_i} \quad \text{where} \quad s = \max \left\{ i : \sqrt{\lambda_i} \geq \varepsilon, i = 1, \dots, d \right\}.$$

*Proof.* The change of variable  $\mathbf{x}' = \mathbf{M}^{1/2}\mathbf{x}$  implies  $\|\mathbf{x}\|_2 = \|\mathbf{x}'\|_{M^{-1}}$  and  $\|\mathbf{x}\|_M = \|\mathbf{x}'\|_2$ . Therefore  $\mathcal{M}(B, \varepsilon, \|\cdot\|_M) = \mathcal{M}(E, \varepsilon, \|\cdot\|_2)$  where  $E \equiv \{\mathbf{x} \in \mathbb{R}^d : \|\mathbf{x}\|_{M^{-1}} \leq 1\}$  is the unit ball in the norm  $\|\cdot\|_{M^{-1}}$ . Next, we write the coordinates  $(x_1, \dots, x_d)$  of any point  $\mathbf{x} \in \mathbb{R}^d$  using the orthonormal basis  $\mathbf{u}_1, \dots, \mathbf{u}_d$ . Consider the truncated ellipsoid  $\tilde{E} \equiv \{\mathbf{x} \in E : x_i = 0, i = s+1, \dots, d\}$ . By adapting an argument from [3], we prove that any  $\varepsilon$ -cover of  $\tilde{E}$  according to  $\|\cdot\|_2$  is also a  $(\varepsilon\sqrt{2})$ -cover of  $E$  according to the same norm. Indeed, let  $\tilde{S} \subset \tilde{E}$  be a  $\varepsilon$ -cover of  $\tilde{E}$ . Fix any  $\mathbf{x} \in E$  and let

$$\begin{aligned} \min_{\tilde{\mathbf{x}} \in \tilde{S}} \|\mathbf{x} - \tilde{\mathbf{x}}\|_2^2 &= \min_{\tilde{\mathbf{x}} \in \tilde{S}} \sum_{j=1}^s (x_j - \tilde{x}_j)^2 + \sum_{j=s+1}^d x_j^2 \\ &\leq \varepsilon^2 + \sum_{j=s+1}^d x_j^2 && \text{(since } \tilde{S} \text{ is a } \varepsilon\text{-covering of } \tilde{E}) \\ &\leq \varepsilon^2 + \lambda_{s+1} \sum_{j=s+1}^d \frac{x_j^2}{\lambda_j} && \text{(since } \lambda_{s+1}/\lambda_j \geq 1 \text{ for } j = s+1, \dots, d) \\ &\leq 2\varepsilon^2 \end{aligned}$$

where the last inequality holds since  $\lambda_{s+1} \leq \varepsilon^2$  and since  $\|\mathbf{x}\|_{M^{-1}}^2 = \sum_{i=1}^d x_i^2/\lambda_i \leq 1$  for any  $\mathbf{x} \in E$ , where  $x_i = \mathbf{u}_i^\top \mathbf{x}$  for all  $i = 1, \dots, d$ . Let  $B' \subset \mathbb{R}^d$  be the unit Euclidean ball, and let  $\tilde{B}' \equiv \{\mathbf{x} \in B' : x_i = 0, i = s+1, \dots, d\}$  be its truncated version. Since  $\lambda_i \geq \varepsilon^2$  for  $i = 1, \dots, s$  we have that for all  $\mathbf{x} \in \varepsilon\tilde{B}'$ ,  $x_1^2 + \dots + x_s^2 \leq \varepsilon^2$  and so

$$\|\mathbf{x}\|_{M^{-1}}^2 = \sum_{i=1}^s \frac{x_i^2}{\lambda_i} \leq \sum_{i=1}^s \frac{\varepsilon^2}{\lambda_i} \leq 1.$$

Therefore  $\varepsilon \tilde{B}' \subseteq \tilde{E}$  which implies  $\text{vol}(\tilde{E} + \frac{\varepsilon}{2} \tilde{B}') \leq \text{vol}(2\tilde{E})$ .

$$\begin{aligned}
\mathcal{M}(E, 2\varepsilon\sqrt{2}, \|\cdot\|_2) &\leq \mathcal{N}(E, \varepsilon\sqrt{2}, \|\cdot\|_2) \\
&\leq \mathcal{N}(\tilde{E}, \varepsilon, \|\cdot\|_2) \\
&\leq \mathcal{M}(\tilde{E}, \varepsilon, \|\cdot\|_2) \\
&\leq \frac{\text{vol}(\tilde{E} + \frac{\varepsilon}{2} \tilde{B}')}{\text{vol}(\frac{\varepsilon}{2} \tilde{B}')} \quad (\text{by Lemma 1}) \\
&\leq \frac{\text{vol}(2\tilde{E})}{\text{vol}(\frac{\varepsilon}{2} \tilde{B}')} = \left(\frac{4}{\varepsilon}\right)^s \frac{\text{vol}(\tilde{E})}{\text{vol}(\tilde{B}')}
\end{aligned}$$

Now, using the standard formula for the volume of an ellipsoid,

$$\text{vol}(\tilde{E}) = \text{vol}(\tilde{B}') \prod_{i=1}^s \sqrt{\lambda_i}.$$

This concludes the proof.  $\square$

The following lemma states that whenever  $f$  has bounded partial derivatives with respect to the eigenbase of  $M$ , then  $f$  is Lipschitz with respect to  $\|\cdot\|_M$ .

**Lemma** (Bounded derivatives imply Lipschitzness in  $M$ -metric). *Let  $f : \mathcal{X} \rightarrow \mathbb{R}$  be everywhere differentiable. Then for any  $\mathbf{x}, \mathbf{x}' \in \mathcal{X}$ ,*

$$|f(\mathbf{x}) - f(\mathbf{x}')| \leq \|\mathbf{x} - \mathbf{x}'\|_M \sqrt{\sum_{i=1}^d \frac{\|\nabla_{\mathbf{u}_i} f\|_\infty^2}{\lambda_i}}.$$

*Proof.* By the mean value theorem, there exists a  $\mathbf{z}$  on the segment joining  $\mathbf{x}$  and  $\mathbf{y}$  such that  $f(\mathbf{x}) - f(\mathbf{y}) = \nabla f(\mathbf{z})^\top (\mathbf{x} - \mathbf{y})$ . Hence

$$\begin{aligned}
f(\mathbf{x}) - f(\mathbf{y}) &= \nabla f(\mathbf{z})^\top (\mathbf{x} - \mathbf{y}) \\
&= \sum_{i=1}^d \nabla f(\mathbf{z})^\top \mathbf{u}_i \mathbf{u}_i^\top (\mathbf{x} - \mathbf{y}) \\
&\leq \sum_{i=1}^d \left( \sup_{\mathbf{z}' \in \mathcal{X}} \nabla f(\mathbf{z}')^\top \mathbf{u}_i \right) \mathbf{u}_i^\top (\mathbf{x} - \mathbf{y}) \\
&= \sum_{i=1}^d \frac{\|\nabla_{\mathbf{u}_i} f\|_\infty}{\sqrt{\lambda_i}} \left( \sqrt{\lambda_i} \mathbf{u}_i^\top (\mathbf{x} - \mathbf{y}) \right) \\
&\leq \sqrt{\sum_{i=1}^d \frac{\|\nabla_{\mathbf{u}_i} f\|_\infty^2}{\lambda_i}} \sqrt{\sum_{i=1}^d \lambda_i (\mathbf{u}_i^\top (\mathbf{x} - \mathbf{y}))^2} \quad (\text{by the Cauchy-Schwarz inequality}) \\
&= \|\mathbf{x} - \mathbf{y}\|_M \sqrt{\sum_{i=1}^d \frac{\|\nabla_{\mathbf{u}_i} f\|_\infty^2}{\lambda_i}}.
\end{aligned}$$

By symmetry, we can upper bound  $f(\mathbf{y}) - f(\mathbf{x})$  with the same quantity.  $\square$

Now we are ready to prove the regret bound.

**Theorem** (Regret with Fixed Metric). *Suppose Algorithm 1 is run with a positive definite matrix  $M$  with eigenbasis  $\mathbf{u}_1, \dots, \mathbf{u}_d$  and eigenvalues  $1 = \lambda_1 \geq \dots \geq \lambda_d > 0$ . Then, for any differentiable  $f : \mathcal{X} \rightarrow \mathbb{R}$  we have that*

$$R_T(f) \stackrel{\tilde{O}}{=} \left( \sqrt{\det_\kappa(M)} + \sqrt{\sum_{i=1}^d \frac{\|\nabla_{\mathbf{u}_i} f\|_\infty^2}{\lambda_i}} \right) T^{\frac{\rho_T}{1+\rho_T}}$$

where  $\kappa = \kappa(\rho_T, T) \leq \rho_T \leq d$ .

*Proof.* Let  $S_t$  be the value of the variable  $S$  at the end of time  $t$ . Hence  $S_0 = \emptyset$ . The functions  $\pi_t : \mathcal{X} \rightarrow \{1, \dots, t\}$  for  $t = 1, 2, \dots$  map each data point  $\mathbf{x}$  to its closest (in norm  $\|\cdot\|_M$ ) center in  $S_{t-1}$ ,

$$\pi_t(\mathbf{x}) = \begin{cases} \arg \min_{s \in S_{t-1}} \|\mathbf{x} - \mathbf{x}_s\|_M & \text{if } S_{t-1} \neq \emptyset \\ t & \text{otherwise.} \end{cases}$$

The set  $T_s$  contain all data points  $\mathbf{x}_t$  that at time  $t$  belonged to the ball with center  $\mathbf{x}_s$  and radius  $\varepsilon_t$ ,

$$T_s \equiv \{t : \|\mathbf{x}_t - \mathbf{x}_s\|_M \leq \varepsilon_t, t = s, \dots, T\}.$$

Finally,  $y_s^*$  is the best fixed prediction for all examples  $(\mathbf{x}_t, y_t)$  such that  $t \in T_s$ ,

$$y_s^* = \arg \min_{y \in \mathcal{Y}} \sum_{t \in T_s} \ell_t(y) = \frac{1}{|T_s|} \sum_{t \in T_s} y_t. \quad (1)$$

We proceed by decomposing the regret into a local (estimation) and a global (approximation) term,

$$R_T(f) = \sum_{t=1}^T (\ell_t(\hat{y}_t) - \ell_t(f(\mathbf{x}_t))) = \sum_{t=1}^T (\ell_t(\hat{y}_t) - \ell_t(y_{\pi_t(\mathbf{x}_t)}^*)) + \sum_{t=1}^T (\ell_t(y_{\pi_t(\mathbf{x}_t)}^*) - \ell_t(f(\mathbf{x}_t))).$$

The estimation term is bounded as

$$\sum_{t=1}^T (\ell_t(\hat{y}_t) - \ell_t(y_{\pi_t(\mathbf{x}_t)}^*)) = \sum_{s \in S_T} \sum_{t \in T_s} (\ell_t(\hat{y}_t) - \ell_t(y_s^*)) \leq 8 \sum_{s \in S_T} \ln(e|N_s|) \leq 8 \ln(eT) |S_T|.$$

The first inequality is a known bound on the regret under square loss [1, page 43]. We upper bound the size of the final packing  $S_T$  using Lemma 2,

$$|S_T| \leq \mathcal{M}(B, \varepsilon_T, \|\cdot\|_M) \leq \left( \frac{8\sqrt{2}}{\varepsilon_T} \right)^\kappa \prod_{i=1}^\kappa \sqrt{\lambda_i} \leq (8\sqrt{2})^\kappa \sqrt{\det_\kappa(\mathbf{M})} T^{\frac{\kappa}{1+\rho_T}}$$

where  $\kappa = \kappa(\rho_T, T)$ . Therefore, since  $\rho_T \geq \kappa(\rho_T, T)$ ,

$$\sum_{t=1}^T (\ell_t(\hat{y}_t) - \ell_t(y_{\pi_t(\mathbf{x}_t)}^*)) \leq 8 \ln(eT) (8\sqrt{2})^{\rho_T} \sqrt{\det_\kappa(\mathbf{M})} T^{\frac{\rho_T}{1+\rho_T}}. \quad (2)$$

Next, we bound the approximation term. Using (1) we have

$$\sum_{t=1}^T (\ell_t(y_{\pi_t(\mathbf{x}_t)}^*) - \ell_t(f(\mathbf{x}_t))) \leq \sum_{t=1}^T (\ell_t(f(\mathbf{x}_{\pi_t(\mathbf{x}_t)})) - \ell_t(f(\mathbf{x}_t))).$$

Note that  $\ell_t$  is 2-Lipschitz because  $y_t, \hat{y}_t \in [0, 1]$ . Hence, using Lemma 3,

$$\begin{aligned} \ell_t(f(\mathbf{x}_{\pi_t(\mathbf{x}_t)})) - \ell_t(f(\mathbf{x}_t)) &\leq 2 \|f(\mathbf{x}_{\pi_t(\mathbf{x}_t)}) - f(\mathbf{x}_t)\| \\ &\leq 2 \|\mathbf{x}_t - \mathbf{x}_{\pi_t(\mathbf{x}_t)}\|_M \sqrt{\sum_{i=1}^d \frac{\|\nabla_{\mathbf{u}_i} f\|_\infty^2}{\lambda_i}} \\ &\leq 2\varepsilon_t \sqrt{\sum_{i=1}^d \frac{\|\nabla_{\mathbf{u}_i} f\|_\infty^2}{\lambda_i}}. \end{aligned}$$

Recalling  $\varepsilon_t = t^{-\frac{1}{1+\rho_t}}$  where  $\rho_t \leq \rho_{t+1}$ , we write

$$\sum_{t=1}^T t^{-\frac{1}{1+\rho_t}} \leq \sum_{t=1}^T t^{-\frac{1}{1+\rho_T}} \leq \int_0^T \tau^{-\frac{1}{1+\rho_T}} d\tau = \left(1 + \frac{1}{\rho_T}\right) T^{\frac{\rho_T}{1+\rho_T}} \leq 2T^{\frac{\rho_T}{1+\rho_T}}.$$

Thus we may write

$$\sum_{t=1}^T (\ell_t(y_{\pi_t(\mathbf{x}_t)}^*) - \ell_t(f(\mathbf{x}_t))) \leq 4 \left( \sqrt{\sum_{i=1}^d \frac{\|\nabla_{\mathbf{u}_i} f\|_\infty^2}{\lambda_i}} \right) T^{\frac{\rho_T}{1+\rho_T}}.$$

The proof is concluded by combining the above with (2).  $\square$

## References

- [1] N. Cesa-Bianchi and G. Lugosi. *Prediction, Learning, and Games*. Cambridge University Press, 2006.
- [2] S. Trivedi, J. Wang, S. Kpotufe, and G. Shakhnarovich. A consistent Estimator of the Expected Gradient Outerproduct. In *Conference on Uncertainty in Artificial Intelligence (UAI)*, 2014.
- [3] M. Wainwright. *High-Dimensional Statistics: A Non-Asymptotic Viewpoint (In Preparation)*. 2017.
